# Supplementary material for: Development and validation of a novel miRNA classifier as a prognostic signature for stage II/III colorectal cancer
Source: PubMed Central journal article supplement — Ann Transl Med. 2021 May;9(9):747. doi: 10.21037/atm-20-1751 (PMC8246165; doi:10.21037/atm-20-1751), 2021-05
Supplement: atm-09-09-747-supplementary.pdf [file atm-09-09-747-supplementary.pdf]

## Supplementary

Table S1 Differential expressed miRNAs reported in at least 3 expression profiling studies (up: n=60, down: n=41)

| miRNA           |          | Accession number | Mature sequence (5'→3') | Studies [suppl. ref. (23,39-58)]   | Expression |
|-----------------|----------|------------------|-------------------------|------------------------------------|------------|
| Name            | Symbol   | (miRBase)        |                         |                                    |            |
| hsa-miR-20a-5p  | miR-20a  | MIMAT0000075     | uaaagugcuuaagugcagguag  | 12 (39,40,42-45,47,49,54-57)       | Up         |
| hsa-miR-31-5p   | miR-31   | MIMAT0000089     | aggcaagugcuggcauagcu    | 12 (39,40,42,43,46-49,51,53,54,57) | Up         |
| hsa-miR-183-5p  | miR-183  | MIMAT0000261     | uauggcacugguagaauucacu  | 12 (39-43,46-49,51,54,57)          | Up         |
| hsa-miR-182-5p  | miR-182  | MIMAT0000259     | uuuggcaugguagaacucacacu | 12 (39-43,46-49,51,54)             | Up         |
| has-miR-21-5p   | miR-21   | MIMAT0000076     | uagcuuaucagacugauguuga  | 11 (39,40,43,45-47,49,51,54,55,57) | Up         |
| hsa-miR-17-5p   | miR-17   | MIMAT0000070     | caaagugcuuacagugcagguag | 10 (39,40,42,43,45,47,49,51,54,55) | Up         |
| hsa-miR-224-5p  | miR-224  | MIMAT0000281     | caagucacugugguuccguu    | 9 (39,40,42,44,46,49,51,56,57)     | Up         |
| hsa-miR-106a-5p | miR-106a | MIMAT0000103     | aaaagugcuuacagugcagguag | 9 (39,40,43,47,49,51,55-57)        | Up         |
| hsa-miR-19a-3p  | miR-19a  | MIMAT0004490     | aguuuugcauaguugcacuaca  | 9 (39,40,43,45,47,49,51,54,57)     | Up         |
| hsa-miR-92a-3p  | miR-92a  | MIMAT0000092     | uaugcacuuguccggccugu    | 8 (40,42,45,47,51,55-57)           | Up         |
| hsa-miR-96-5p   | miR-96   | MIMAT0000095     | uuuggcacuagcacaauuuugcu | 8 (39,40,43,44,46,47,50,57)        | Up         |
| hsa-miR-203a-3p | miR-203a | MIMAT0000264     | gugaaauguuagggaccacuag  | 8 (39,40,43-45,49,55,57)           | Up         |
| hsa-miR-135b-5p | miR-135b | MIMAT0000758     | uauggcuuucauuccuauuguga | 8 (43,46,47,50,52,53,56,57)        | Up         |
| hsa-miR-18a-5p  | miR-18a  | MIMAT0000072     | uaaggugcaucuaugcagauag  | 8 (39,42,43,46,48,49,51,56)        | Up         |
| hsa-miR-93-5p   | miR-93   | MIMAT0000093     | caaagugcuuucgugcagguag  | 7 (39,41,43,47,48,54,55)           | Up         |
| hsa-miR-95-3p   | miR-95   | MIMAT0026473     | ucaauaaaugucuguguauu    | 7 (39,40,42,53,55-57)              | Up         |
| hsa-miR-106b-5p | miR-106b | MIMAT0000680     | uaaagugcugacagucagau    | 7 (39,41,45,47,48,55,56)           | Up         |
| hsa-miR-522-3p  | miR-522  | MIMAT0002868     | aaaugguuccuuuagagugu    | 6 (43,44,47,48-50)                 | Up         |
| hsa-miR-1246    | miR-1246 | MIMAT0005898     | aauggauuuuuggagcagg     | 6 (44,45,48,49,51,53)              | Up         |
| hsa-miR-130b-3p | miR-130b | MIMAT0000691     | cagugcaugaagaaaggcgu    | 6 (39,40,46,48,51,54)              | Up         |
| hsa-miR-148a-3p | miR-148a | MIMAT0000243     | ucagugcacuacagaacuuugu  | 6 (23,40,43,44,54,57)              | Up         |
| hsa-miR-18b-5p  | miR-18b  | MIMAT0001412     | uaaggugcaucuaugcaguuag  | 6 (41,42,47-49,51)                 | Up         |
| hsa-miR-17-3p   | miR-17*  | MIMAT0000071     | acugcagugaggcagcuuguag  | 5 (40,43,47,49,57)                 | Up         |
| hsa-miR-183-3p  | miR-183* | MIMAT0004560     | gugaauuaccgaaggccauaa   | 5 (44,45,47,52,53)                 | Up         |
| hsa-miR-221-3p  | miR-221  | MIMAT0000278     | agcuacauugucugcugguuuc  | 5 (23,40,45,54,56)                 | Up         |
| hsa-miR-503-5p  | miR-503  | MIMAT0002874     | uagcagcggaacaguuucgag   | 5 (44,46,48,49,51)                 | Up         |
| hsa-miR-181b-5p | miR-181b | MIMAT0000257     | aacauuauugcugcggugggu   | 5 (39,40,45,55,57)                 | Up         |
| hsa-miR-34a-5p  | miR-34a  | MIMAT0000255     | uggcagugcuuagcugguugu   | 5 (39-41,55,57)                    | Up         |
| hsa-miR-15a-5p  | miR-15a  | MIMAT0000068     | uagcagcacauaugguuugug   | 5 (23,40,43,54,57)                 | Up         |
| has-miR-21-3p   | miR-21*  | MIMAT0004494     | caacaccagugcaggcugcu    | 4 (44,48,49,51)                    | Up         |
| hsa-miR-25-3p   | miR-25   | MIMAT0000081     | cauugcacuugucgggucuga   | 4 (39,40,43,49)                    | Up         |
| hsa-miR-210-3p  | miR-210  | MIMAT0000267     | cugugcugugacagcgccuga   | 4 (40,48,55,57)                    | Up         |
| hsa-miR-223-3p  | miR-223  | MIMAT0000280     | ugucaguuuugcaauacccca   | 4 (43,47,55,56)                    | Up         |
| hsa-miR-429     | miR-429  | MIMAT0001536     | uaauacugucuguaaacccgu   | 4 (44,45,49,51)                    | Up         |
| hsa-miR-584-5p  | miR-584  | MIMAT0003249     | uuugguuuuccgaggacugag   | 4 (46-48,50)                       | Up         |
| hsa-miR-1247-5p | miR-1247 | MIMAT0005899     | acccgucccuuguccccgga    | 4 (41,44,50,53)                    | Up         |
| hsa-miR-29a-3p  | miR-29a  | MIMAT0000086     | uagcaccuucgaaucgguuua   | 4 (39,40,42,57)                    | Up         |
| hsa-miR-338-3p  | miR-338  | MIMAT0000763     | uccagcaucagugauuuugug   | 4 (23,40,44,55)                    | Up         |
| hsa-miR-135a-5p | miR-135a | MIMAT0000428     | uauggcuuuuauuccuauuguga | 4 (23,40,55,57)                    | Up         |
| hsa-miR-7-5p    | miR-7    | MIMAT0000252     | uggaagacuagugauuuuguugu | 3 (42,43,50)                       | Up         |
| hsa-miR-20b-5p  | miR-20b  | MIMAT0001413     | caaagugcucauagucagguag  | 3 (23,45,49)                       | Up         |
| hsa-miR-98-5p   | miR-98   | MIMAT0000096     | ugagguaaguuguuuuuuguu   | 3 (40,43,54)                       | Up         |
| hsa-miR-105-5p  | miR-105  | MIMAT0000096     | ugagguaaguuguuuuuuguu   | 3 (40,44,50)                       | Up         |
| hsa-miR-128-3p  | miR-128  | MIMAT0000424     | ucacagugaaccggucucuuu   | 3 (23,40,48)                       | Up         |
| hsa-miR-182-3p  | miR-182  | MIMAT0000260     | ugguucugacuugccaacua    | 3 (40,53,57)                       | Up         |
| hsa-miR-185-5p  | miR-185  | MIMAT0000455     | uggagagaaggcaguuuccuga  | 3 (23,47,55)                       | Up         |
| has-miR-198     | miR-198  | MIMAT0000228     | gguccagaggagauaggguuc   | 3 (44,47,53)                       | Up         |
| hsa-miR-222-3p  | miR-222  | MIMAT0000279     | agcuacauugcucuggggu     | 3 (40,55,56)                       | Up         |
| hsa-miR-320a    | miR-320a | MIMAT0000510     | aaaagcuggguagagggcgga   | 3 (23,40,47)                       | Up         |
| hsa-miR-339-5p  | miR-339  | MIMAT0000764     | ucccugucccaggagcucacg   | 3 (40,43,51)                       | Up         |
| hsa-miR-346     | miR-346  | MIMAT0000773     | ugucugcccgcaugccuccucu  | 3 (47,53,55)                       | Up         |
| has-mir-421     | mir-421  | MIMAT0003339     | aucaacagacauuuuuggcgcc  | 3 (43,48,49)                       | Up         |
| hsa-miR-424-3p  | miR-424  | MIMAT0004749     | caaaacgugaggcugcuau     | 3 (41,44,49)                       | Up         |
| hsa-miR-452-5p  | miR-452  | MIMAT0001635     | aacuguuugcagaggaaacuga  | 3 (43,46,47)                       | Up         |
| hsa-miR-645     | miR-645  | MIMAT0003315     | ucuaaggcuguaucugcuga    | 3 (23,47,53)                       | Up         |
| hsa-miR-663b    | miR-663b | MIMAT0005867     | gguggcccgccgugccugagg   | 3 (44,48,53)                       | Up         |
| has-miR-142-3p  | miR-142* | MIMAT0000434     | uguaguguuuuccuauuuuugga | 3 (40,42,54)                       | Up         |
| hsa-miR-19b-3p  | miR-19b  | MIMAT0000074     | ugugcaaaucagcaaaacuga   | 3 (39,51,54)                       | Up         |
| hsa-miR-29b-3p  | miR-29b  | MIMAT0000100     | uagcaccuuuuuuaaaccaguuu | 3 (39,43,57)                       | Up         |
| hsa-miR-196b-5p | miR-196b | MIMAT0001080     | uagguaguuuucuguuuggg    | 3 (42,43,51)                       | Up         |
| hsa-miR-145-5p  | miR-145  | MIMAT0000437     | guccaguuuuuccaggaaucccu | 14 (39,40,42,43,45-47,49-53,57,58) | Down       |
| hsa-miR-139-5p  | miR-139  | MIMAT0000250     | ucucagugcagcugucuccagu  | 13 (39,40,43,44,46,48-54,57)       | Down       |
| hsa-miR-195-5p  | miR-195  | MIMAT0000461     | uagcagcacagaaauuuggc    | 11 (39,40,44,46-53)                | Down       |
| hsa-miR-215-5p  | miR-215  | MIMAT0000272     | augaccuauaauugacagac    | 10 (44-49,52,54,55,58)             | Down       |
| hsa-miR-378a-5p | miR-378a | MIMAT0000731     | cuccugacuccagguccugugu  | 9 (43,44,46,47,49-53)              | Down       |
| hsa-miR-422a    | miR-422a | MIMAT0001339     | acuggacuauaggucagaaggc  | 9 (39,44,46,48-52,54)              | Down       |
| hsa-miR-143-3p  | miR-143  | MIMAT0000435     | ugagaugaagcacuugacuc    | 8 (39,42,47,49,51-53,21)           | Down       |
| hsa-miR-30a-5p  | miR-30a  | MIMAT0000087     | uguuaaacucccagacuggaag  | 8 (39,44,46-49,53,21)              | Down       |
| hsa-miR-30a-3p  | miR-30a* | MIMAT0000088     | cuuucagucggaguuuugcagc  | 8 (39,40,44,49,52,53,55,57)        | Down       |
| hsa-miR-1-3p    | miR-1    | MIMAT0000416     | uggaauguaaagaaguauuguau | 7 (39,46,47,50,53-55)              | Down       |
| hsa-miR-149-5p  | miR-149  | MIMAT0000450     | ucuggcuccgugcuucacuccc  | 7 (40,44,49,51,53,54,57)           | Down       |
| hsa-miR-138-5p  | miR-138  | MIMAT0000430     | agcuggguguguaucaggccg   | 7 (44,46,47,49,51-53)              | Down       |
| has-miR-342-3p  | miR-342  | MIMAT0000753     | ucucacagaaucgcaccgcu    | 7 (44,47,49,51-53,55)              | Down       |
| hsa-miR-100-5p  | miR-100  | MIMAT0000098     | aaaccgugauuccgaacuugug  | 6 (47-49,52,53,57)                 | Down       |
| hsa-miR-150-5p  | miR-150  | MIMAT0000451     | ucucccaaccuugaccagug    | 6 (41,43,44,47-49)                 | Down       |
| hsa-miR-497-5p  | miR-497  | MIMAT0002820     | cagcagcacacuguguuugu    | 6 (42,44,46,48,49,53)              | Down       |
| hsa-miR-10b-5p  | miR-10b  | MIMAT0000254     | uaccuguaagaccgaauuugug  | 6 (39,44,47,49,51,53)              | Down       |
| hsa-miR-125a-5p | miR-125a | MIMAT0000443     | ucccugagaccuuuaaccuguga | 6 (39,41,43,47,49,58)              | Down       |
| hsa-miR-30c-5p  | miR-30c  | MIMAT0000244     | uguuaaacuuccuacacucagc  | 6 (39,47,51-53,57)                 | Down       |
| hsa-miR-133a-3p | miR-133a | MIMAT0000427     | uuuggucccuuaaccagcug    | 6 (39,47,49,53,54,57)              | Down       |
| hsa-miR-375     | miR-375  | MIMAT0000728     | uuuugucugcggucguguga    | 5 (43,47,49,52,54)                 | Down       |
| hsa-miR-125b-5p | miR-125b | MIMAT0000423     | ucccugagaccuuaacuuguga  | 5 (39,43,47,53,58)                 | Down       |
| hsa-miR-133b    | miR-133b | MIMAT0000770     | uuuggucccuuaaccagcua    | 5 (23,43,47,53,57)                 | Down       |
| hsa-miR-99a-5p  | miR-99a  | MIMAT0000097     | aaaccgugauccgaacuugug   | 5 (44,49,51-53)                    | Down       |
| hsa-miR-124-3p  | miR-124  | MIMAT0000422     | uaaggcagcggugaaugcc     | 4 (44,47,53,57)                    | Down       |
| hsa-miR-137     | miR-137  | MIMAT0000429     | uuuuugcuuaagaauacgcuag  | 4 (46,53,57,58)                    | Down       |
| hsa-miR-186-5p  | miR-186  | MIMAT0000456     | caaagaauuccuuuuugggcu   | 4 (41,47,52,53)                    | Down       |
| hsa-miR-147b    | miR-147b | MIMAT0004928     | gugugcggaaaugcuucugcua  | 4 (43,46,47,53)                    | Down       |
| hsa-miR-26a-5p  | miR-26a  | MIMAT0000082     | uucagaauaccaggauaggcu   | 4 (47,52,53,58)                    | Down       |
| hsa-miR-29c-3p  | miR-29c  | MIMAT0000681     | uagcaccuuuugaauccguua   | 4 (43,45,47,53)                    | Down       |
| has-miR-140-3p  | miR-140* | MIMAT0004597     | uaccacaggguagaaccagg    | 4 (44,49,51,53)                    | Down       |
| has-miR-28-3p   | miR-28   | MIMAT0004502     | cacuagauugugagcuccgga   | 4 (44,49,51,54)                    | Down       |
| hsa-miR-486-5p  | miR-486  | MIMAT0002177     | uccugacuagcugccccgag    | 4 (50-53)                          | Down       |
| hsa-miR-204-5p  | miR-204  | MIMAT0000265     | uuuccuuugcauccuauugccu  | 4 (53,54,57,58)                    | Down       |
| hsa-miR-454-5p  | miR-454  | MIMAT0003884     | accuaucaauauugucucugc   | 3 (23,48,53)                       | Down       |
| hsa-miR-101-3p  | miR-101  | MIMAT0000099     | uacaguacuguaauaacugaa   | 3 (47,52,53)                       | Down       |
| hsa-miR-192-5p  | miR-192  | MIMAT0000222     | cugaccuauaauugacagcc    | 3 (47,52,55)                       | Down       |
| hsa-miR-383-5p  | miR-383  | MIMAT0000738     | agaucagaaggugauugggcu   | 3 (44,50,53)                       | Down       |
| hsa-miR-585-3p  | miR-585  | MIMAT0003250     | ugggcuauucguugcua       | 3 (46,48,53)                       | Down       |
| hsa-miR-141-3p  | miR-141  | MIMAT0000432     | uaacacugucgguaaagaugg   | 3 (23,47,53)                       | Down       |
| hsa-miR-187-3p  | miR-187  | MIMAT0000262     | ucgugcuuugugcagcgg      | 3 (47,53,57)                       | Down       |

Suppl. ref., supplementary reference.

## References

39. Arndt GM, Dossey L, Cullen LM, et al. Characterization of global microRNA expression reveals oncogenic potential of miR-145 in metastatic colorectal cancer. *BMC Cancer* 2009;9:374.
40. Monzo M, Navarro A, Bandres E, et al. Overlapping expression of microRNAs in human embryonic colon and colorectal cancer. *Cell Res* 2008;18:823-33.
41. Ma Y, Zhang P, Wang F, et al. miR-150 as a potential biomarker associated with prognosis and therapeutic outcome in colorectal cancer. *Gut* 2012;61:1447-53.
42. Motoyama K, Inoue H, Takatsuno Y, et al. Over- and under-expressed microRNAs in human colorectal cancer. *Int J Oncol* 2009;34:1069-75.
43. Li X, Zhang G, Luo F, et al. Identification of aberrantly expressed miRNAs in rectal cancer. *Oncol Rep* 2012;28:77-84.
44. Yong FL, Law CW, Wang CW. Potentiality of a triple microRNA classifier: miR-193a-3p, miR-23a and miR-338-5p for early detection of colorectal cancer. *BMC Cancer* 2013;13:280.
45. Zhang JX, Song W, Chen ZH, et al. Prognostic and predictive value of a microRNA signature in stage II colon cancer: a microRNA expression analysis. *Lancet Oncol* 2013;14:1295-306.
46. Rohr C, Kerick M, Fischer A, et al. High-throughput miRNA and mRNA sequencing of paired colorectal normal, tumor and metastasis tissues and bioinformatic modeling of miRNA-1 therapeutic applications. *PLoS One* 2013;8:e67461.
47. Gaedcke J, Grade M, Camps J, et al. The rectal cancer microRNAome--microRNA expression in rectal cancer and matched normal mucosa. *Clin Cancer Res* 2012;18:4919-30.
48. Zhao Y, Miao G, Li Y, et al. MicroRNA-130b suppresses migration and invasion of colorectal cancer cells through downregulation of integrin beta1 [corrected]. *PLoS One* 2014;9:e87938.
49. Pizzini S, Bisognin A, Mandruzzato S, et al. Impact of microRNAs on regulatory networks and pathways in human colorectal carcinogenesis and development of metastasis. *BMC Genomics* 2013;14:589.
50. Hamfjord J, Stangeland AM, Hughes T, et al. Differential expression of miRNAs in colorectal cancer: comparison of paired tumor tissue and adjacent normal mucosa using high-throughput sequencing. *PLoS One* 2012;7:e34150.
51. Piepoli A, Tavano F, Copetti M, et al. Mirna expression profiles identify drivers in colorectal and pancreatic cancers. *PLoS One* 2012;7:e33663.
52. Faltejiskova P, Svoboda M, Srutova K, et al. Identification and functional screening of microRNAs highly deregulated in colorectal cancer. *J Cell Mol Med* 2012;16:2655-66.
53. Balaguer F, Moreira L, Lozano JJ, et al. Colorectal cancers with microsatellite instability display unique miRNA profiles. *Clin Cancer Res* 2011;17:6239-49.
54. Chang KH, Miller N, Kheirleiseid EA, et al. MicroRNA signature analysis in colorectal cancer: identification of expression profiles in stage II tumors associated with aggressive disease. *Int J Colorectal Dis* 2011;26:1415-22.
55. Schetter AJ, Leung SY, Sohn JJ, et al. MicroRNA expression profiles associated with prognosis and therapeutic outcome in colon adenocarcinoma. *JAMA* 2008;299:425-36.
56. Ng EK, Chong WW, Jin H, et al. Differential expression of microRNAs in plasma of patients with colorectal cancer: a potential marker for colorectal cancer screening. *Gut* 2009;58:1375-81.
57. Bandres E, Cubedo E, Agirre X, et al. Identification by Real-time PCR of 13 mature microRNAs differentially expressed in colorectal cancer and non-tumoral tissues. *Mol Cancer* 2006;5:29.
58. Ng EK, Tsang WP, Ng SS, et al. MicroRNA-143 targets DNA methyltransferases 3A in colorectal cancer. *Br J Cancer* 2009;101:699-706.
